# Supplementary material for: Widespread Exposure to Mosquitoborne California Serogroup Viruses in Caribou, Arctic Fox, Red Fox, and Polar Bears, Canada
Source: PubMed Central journal article supplement (PMC9796188; doi:10.3201/eid2901.220154), 2023-01
Supplement: 22-0154-Techapp-s1.pdf [file 22-0154-Techapp-s1.pdf]

# Widespread Exposure to Mosquitoborne California Serogroup Viruses in Caribou, Arctic Fox, Red Fox, and Polar Bears, Canada

## Appendix

**Appendix Table 1.** Comparison of model fit for top biologic and climatic factors linked to seroprevalence of California serogroup viruses in adult polar bears of western Hudson Bay, Canada, 1986–2017 in study of widespread exposure to mosquitoborne California serogroup viruses in caribou, Arctic fox, red fox, and polar bears\*

| Rank | Type     | Model                                      | k | LL      | AIC <sub>c</sub> | ΔAIC <sub>c</sub> |
|------|----------|--------------------------------------------|---|---------|------------------|-------------------|
| 1    | Combined | (1 BearID) + sex + age + conflict† + STemp | 6 | -207.90 | 427.98           | 0.00              |
| 2    | Biologic | (1 BearID) + sex + age + conflict          | 5 | -222.40 | 463.14           | 35.16             |
| 3    | Climatic | (1 BearID) + STemp                         | 3 | -229.00 | 464.04           | 36.07             |
| 4    | Null     | (1 BearID)                                 | 2 | -241.50 | 487.06           | 59.09             |

\*Models were fitted by using a binomial logit-link generalized linear mixed model with individual Bear ID (1|BearID) as a random effect to account for repeat animals. AIC<sub>c</sub>, Akaike's information criterion for small samples; k, penalty multiplier for model complexity; LL, log-likelihood; STemp, summer temperature.

†Bears with a history of capture as part of the Polar Bear Alert Program prior to sampling.

**Appendix Table 2.** Mean values for climatic variables used in binomial logit-link generalized linear mixed models for each period of polar bear exposure to California serogroup viruses in the Hudson Bay, Canada, 1986–2017, in study of widespread exposure to mosquitoborne California serogroup viruses in caribou, Arctic fox, red fox, and polar bears\*

| Variables†                     | 1986–1989    | 1995–1998    | 2015–2017    |
|--------------------------------|--------------|--------------|--------------|
| Ice free, d                    | 114 ± 6      | 141 ± 16     | 145 ± 7      |
| Summer temperature, °C         | 9.1 ± 0.9    | 10.5 ± 0.6   | 10.3 ± 0.9   |
| Summer precipitation, mm       | 212.5 ± 49.5 | 274.1 ± 42.4 | 226.0 ± 16.0 |
| Winter minimum temperature, °C | -27.5 ± 2.0  | -27.2 ± 1.9  | -25.9 ± 1.3  |
| Annual temperature, °C         | -7.0 ± 1.1   | -6.3 ± 1.2   | -5.7 ± 1.3   |
| Annual precipitation, mm       | 431.7 ± 56.9 | 458.0 ± 45.4 | 366.4 ± 38.3 |

\*This table was published previously (18).

†Values are mean ±SD.
